# Supplementary material for: Water induced electrical hysteresis in germanium nanowires: a theoretical study
Source: Royal Society of Chemistry journal article supplement (doi:10.1039/c1cp20228f), 2011-01-01
Supplement: c1cp20228f.pdf [file c1cp20228f.pdf]

Electronic supplementary information (ESI) available:

## Water induced electrical hysteresis in germanium nanowire: a theoretical study

Mahasin Alam Sk,<sup>a</sup> Man-Fai Ng,<sup>\*b</sup> Shuo-Wang Yang<sup>b</sup> and Kok Hwa Lim<sup>\*a</sup>

<sup>a</sup> Division of Chemical and Biomolecular Engineering, School of Chemical and Biomedical Engineering, Nanyang Technological University, Singapore 639798, Singapore

<sup>b</sup> Institute of High Performance Computing, 1 Fusionopolis Way, #16-16 Connexis, Singapore 138632, Singapore

**Table S1** The optimized average bond lengths<sup>a</sup> (R) of <100> OH-GeNWs with different OH coverage percentage on the NW surface.

| $P_{SC}^b$ | R <sub>Ge-Ge</sub> (Surface) | R <sub>Ge-Ge</sub> (Core) | R <sub>Ge-H</sub> | R <sub>Ge-O</sub> | R <sub>O-H</sub> |
|------------|------------------------------|---------------------------|-------------------|-------------------|------------------|
| 0.00       | 2.47                         | 2.49                      | 1.57-1.58         |                   |                  |
| 4.17       | 2.46-2.49                    | 2.49-2.51                 | 1.57-1.58         | 1.87-1.88         | 0.94             |
| 8.33       | 2.46-2.48                    | 2.49-2.50                 | 1.57-1.58         | 1.87              | 0.95             |
| 16.67      | 2.46-2.49                    | 2.49-2.50                 | 1.57-1.58         | 1.86-1.88         | 0.94             |
| 33.33      | 2.47                         | 2.49                      | 1.57              | 1.86              | 0.95             |
| 66.67      | 2.51-2.52                    | 2.55                      | 1.58              | 1.86              | 0.95             |
| 83.33      | 2.49-2.58                    | 2.50-2.55                 | 1.58              | 1.82-1.88         | 0.95-0.96        |
| 100.00     | 2.46                         | 2.52                      |                   | 1.83-1.89         | 0.95-0.96        |

<sup>a</sup> The R values at Å, <sup>b</sup>  $P_{SC}$  is the surface OH coverage percentage.

**Table S2** The optimized average bond length ( $R^a$ ) of  $\langle 110 \rangle$  OH-GeNWs with different OH coverage percentage on the NW surface.

| $P_{SC}^b$ | $R_{Ge-Ge}$ (Surface) | $R_{Ge-Ge}$ (Core) | $R_{Ge-H}$ | $R_{Ge-O}$ | $R_{O-H}$ |
|------------|-----------------------|--------------------|------------|------------|-----------|
| 0.00       | 2.47-2.50             | 2.50-2.52          | 1.58       |            |           |
| 5.67       | 2.47-2.50             | 2.50-2.51          | 1.57-1.58  | 1.86-1.87  | 0.94      |
| 11.11      | 2.47-2.51             | 2.50-2.52          | 1.57-1.58  | 1.86-1.87  | 0.94      |
| 22.22      | 2.46-2.53             | 2.50-2.54          | 1.57-1.58  | 1.86-1.90  | 0.94-0.95 |
| 33.33      | 2.46-2.52             | 2.49-2.53          | 1.57-1.58  | 1.85-1.88  | 0.94-0.95 |
| 66.67      | 2.44-2.57             | 2.49-2.54          | 1.57-1.59  | 1.85-1.90  | 0.94-0.95 |
| 77.78      | 2.44-2.57             | 2.49-2.54          | 1.57-1.59  | 1.84-1.89  | 0.94-0.95 |
| 100.00     | 2.50-2.63             | 2.50-2.52          |            | 1.83-1.92  | 0.94-0.97 |

<sup>a</sup> The R values at Å, <sup>b</sup>  $P_{SC}$  is the surface OH coverage percentage.

**Table S3** Positional effect of OH group on the stability and band gap of  $\langle 100 \rangle$  GeNW

| Systems | RE (eV) | $E_{\text{gap}}$ (eV) |
|---------|---------|-----------------------|
| GeNW-1  | 0.00    | 2.02 <i>i</i>         |
| GeNW-2  | 0.06    | 1.98 <i>d</i>         |
| GeNW-3  | 0.14    | 2.01 <i>i</i>         |

**Table S4** Positional effect of OH group on the stability and band gap of  $\langle 110 \rangle$  GeNW

| Systems | RE (eV) | $E_{\text{gap}}$ (eV) |
|---------|---------|-----------------------|
| GeNW-1  | 0.14    | 1.17 <i>d</i>         |
| GeNW-2  | 0.14    | 1.16 <i>d</i>         |
| GeNW-3  | 0.02    | 1.11 <i>d</i>         |
| GeNW-4  | 0.00    | 1.13 <i>d</i>         |
| GeNW-5  | 0.03    | 1.13 <i>d</i>         |
| GeNW-6  | 0.03    | 1.13 <i>d</i>         |
| GeNW-7  | 0.02    | 1.13 <i>d</i>         |
| GeNW-8  | 0.14    | 1.17 <i>d</i>         |
| GeNW-9  | 0.13    | 1.16 <i>d</i>         |

**Table S5** Results of regression analysis of  $E_{form}$  with OH coverage percentage

| Systems                       | Equations                                                | $n$ | $r^2$ | $p$     |
|-------------------------------|----------------------------------------------------------|-----|-------|---------|
| $\langle 100 \rangle$ OH-GeNW | $E_{form} = -0.024(\pm 0.000) P_{SC} + 0.203(\pm 0.025)$ | 8   | 0.998 | <0.0001 |
| $\langle 110 \rangle$ OH-GeNW | $E_{form} = -0.018(\pm 0.000) P_{SC} + 0.160(\pm 0.005)$ | 8   | 0.999 | <0.0001 |

**Table S6** Effective mass of electrons in  $\langle 100 \rangle$  and  $\langle 110 \rangle$  OH-GeNWs

| $\langle 100 \rangle$ OH-GeNW |         | $\langle 110 \rangle$ OH-GeNW |         |
|-------------------------------|---------|-------------------------------|---------|
| $P_{SC}^a$                    | $m_e^*$ | $P_{SC}^a$                    | $m_e^*$ |
| 0.00                          | 1.560   | 0.00                          | 0.193   |
| 4.17                          | 4.590   | 5.67                          | 0.198   |
| 8.33                          | 2.910   | 11.11                         | 0.199   |
| 16.67                         | 1.260   | 22.22                         | 0.204   |
| 33.33                         | 0.940   | 33.33                         | 0.233   |
| 66.67                         | 0.823   | 66.67                         | 0.228   |
| 83.33                         | 0.821   | 77.78                         | 0.292   |
| 100.00                        | 0.794   | 100.00                        | 0.294   |

<sup>a</sup>  $P_{SC}$  is the surface OH coverage percentage.

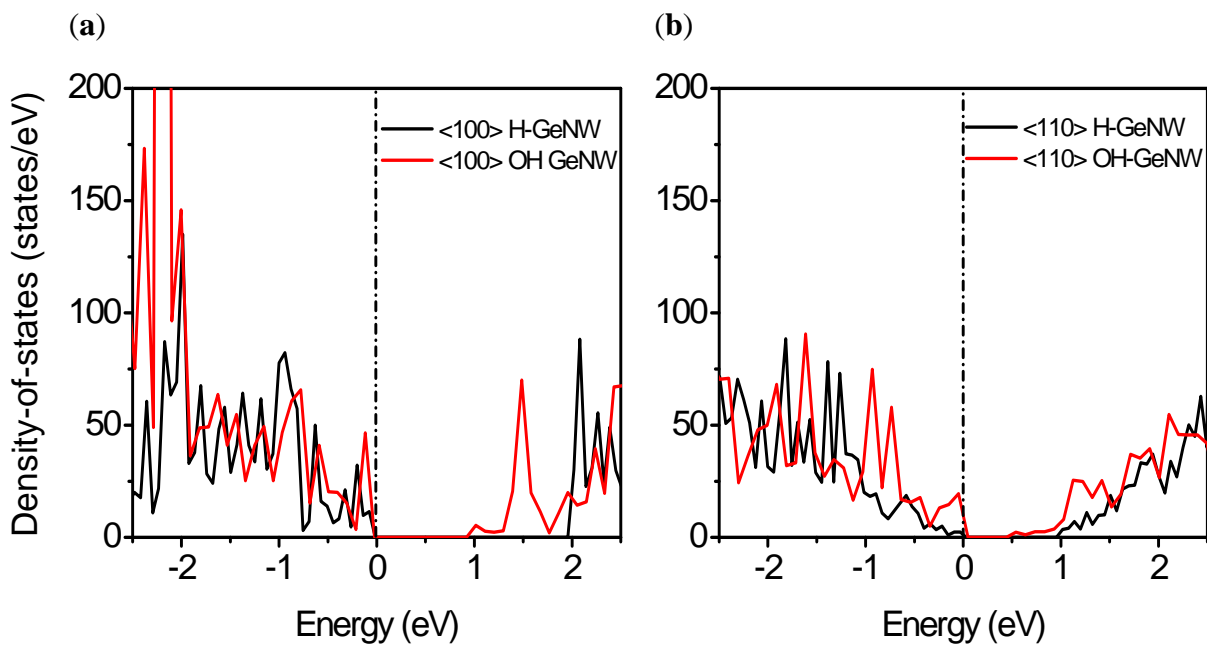

**Fig. S1** Density of state (DOS) of (a)  $\langle 100 \rangle$  GeNW and OH-GeNW and (b)  $\langle 110 \rangle$  GeNW and OH-GeNW, red line is for 100.0% OH-GeNW, black is for GeNW, dash-dot line is the Fermi level. The Fermi level is set to zero.
